# Supplementary material for: What’s in a Name? Parents’ and Healthcare Professionals’ Preferred Terminology for Pathogenic Variants in Childhood Cancer Predisposition Genes
Source: MDPI journal article supplement (doi:10.3390/jpm12081327), 2022-08-18
Supplement: s1 [file s1]

**Supplementary Table S1. Summary of existing guidelines for the description of sequence variation in medical genetics.**

| Author                                                                                | Original date of publication | Date of revisions | Condition/context                                                                                                                                                                                                       | Recommendations                                                                                                                                                                                                                                                                                                                                                                               | Additional comments                                                                                |                        |                             |                             |   |        |       |   |               |          |   |                        |          |   |                   |        |   |            |      |
|---------------------------------------------------------------------------------------|------------------------------|-------------------|-------------------------------------------------------------------------------------------------------------------------------------------------------------------------------------------------------------------------|-----------------------------------------------------------------------------------------------------------------------------------------------------------------------------------------------------------------------------------------------------------------------------------------------------------------------------------------------------------------------------------------------|----------------------------------------------------------------------------------------------------|------------------------|-----------------------------|-----------------------------|---|--------|-------|---|---------------|----------|---|------------------------|----------|---|-------------------|--------|---|------------|------|
| American College of Medical Genetics (ACMG)/Association for Molecular Pathology (AMP) | 2000                         | 2008, 2015        | Laboratory guidelines for reporting of sequence variants in medical genetics. Originally created as educational resource for clinical laboratory geneticists to help them provide quality clinical laboratory services. | Modifier terms for ‘variant’ to describe sequence changes with varying levels of evidence of pathogenicity, <b>OR</b> evidence of benign.                                                                                                                                                                                                                                                     | Suggest that ‘mutation’ and ‘polymorphism’ be replaced by ‘variant.’                               |                        |                             |                             |   |        |       |   |               |          |   |                        |          |   |                   |        |   |            |      |
|                                                                                       |                              |                   |                                                                                                                                                                                                                         | <table><tr><th>Class</th><th>Modifier</th><th>Likelihood of Pathogenicity</th></tr><tr><td>1</td><td>Benign</td><td>&lt;0.1%</td></tr><tr><td>2</td><td>Likely benign</td><td>0.1-9.9%</td></tr><tr><td>3</td><td>Uncertain significance</td><td>10-89.9%</td></tr><tr><td>4</td><td>Likely pathogenic</td><td>90-99%</td></tr><tr><td>5</td><td>Pathogenic</td><td>&gt;99%</td></tr></table> |                                                                                                    | Class                  | Modifier                    | Likelihood of Pathogenicity | 1 | Benign | <0.1% | 2 | Likely benign | 0.1-9.9% | 3 | Uncertain significance | 10-89.9% | 4 | Likely pathogenic | 90-99% | 5 | Pathogenic | >99% |
|                                                                                       |                              |                   |                                                                                                                                                                                                                         | Class                                                                                                                                                                                                                                                                                                                                                                                         |                                                                                                    | Modifier               | Likelihood of Pathogenicity |                             |   |        |       |   |               |          |   |                        |          |   |                   |        |   |            |      |
|                                                                                       |                              |                   |                                                                                                                                                                                                                         | 1                                                                                                                                                                                                                                                                                                                                                                                             |                                                                                                    | Benign                 | <0.1%                       |                             |   |        |       |   |               |          |   |                        |          |   |                   |        |   |            |      |
|                                                                                       |                              |                   |                                                                                                                                                                                                                         | 2                                                                                                                                                                                                                                                                                                                                                                                             |                                                                                                    | Likely benign          | 0.1-9.9%                    |                             |   |        |       |   |               |          |   |                        |          |   |                   |        |   |            |      |
|                                                                                       |                              |                   |                                                                                                                                                                                                                         | 3                                                                                                                                                                                                                                                                                                                                                                                             |                                                                                                    | Uncertain significance | 10-89.9%                    |                             |   |        |       |   |               |          |   |                        |          |   |                   |        |   |            |      |
|                                                                                       |                              |                   |                                                                                                                                                                                                                         | 4                                                                                                                                                                                                                                                                                                                                                                                             |                                                                                                    | Likely pathogenic      | 90-99%                      |                             |   |        |       |   |               |          |   |                        |          |   |                   |        |   |            |      |
| 5                                                                                     | Pathogenic                   | >99%              |                                                                                                                                                                                                                         |                                                                                                                                                                                                                                                                                                                                                                                               |                                                                                                    |                        |                             |                             |   |        |       |   |               |          |   |                        |          |   |                   |        |   |            |      |
|                                                                                       |                              |                   |                                                                                                                                                                                                                         |                                                                                                                                                                                                                                                                                                                                                                                               |                                                                                                    |                        |                             |                             |   |        |       |   |               |          |   |                        |          |   |                   |        |   |            |      |
|                                                                                       |                              |                   |                                                                                                                                                                                                                         |                                                                                                                                                                                                                                                                                                                                                                                               |                                                                                                    |                        |                             |                             |   |        |       |   |               |          |   |                        |          |   |                   |        |   |            |      |
|                                                                                       |                              |                   |                                                                                                                                                                                                                         |                                                                                                                                                                                                                                                                                                                                                                                               |                                                                                                    |                        |                             |                             |   |        |       |   |               |          |   |                        |          |   |                   |        |   |            |      |
|                                                                                       |                              |                   |                                                                                                                                                                                                                         |                                                                                                                                                                                                                                                                                                                                                                                               |                                                                                                    |                        |                             |                             |   |        |       |   |               |          |   |                        |          |   |                   |        |   |            |      |
|                                                                                       |                              |                   |                                                                                                                                                                                                                         |                                                                                                                                                                                                                                                                                                                                                                                               |                                                                                                    |                        |                             |                             |   |        |       |   |               |          |   |                        |          |   |                   |        |   |            |      |
| Human Genome Variant Society (HGVS)                                                   | 2000                         | 2016              | Internationally accepted standard for the consistent and unambiguous description of sequence variants in molecular                                                                                                      | Recommendations relate to naming of mutations at nucleotide, DNA, RNA and protein level descriptions (e.g. location within the gene, type of variation).                                                                                                                                                                                                                                      | Suggest ‘polymorphism’ and ‘mutation’ should no longer used be used. State that only neutral terms |                        |                             |                             |   |        |       |   |               |          |   |                        |          |   |                   |        |   |            |      |

|                                                                                   |                       |      | diagnostics. Guidelines relate to naming of variation at nucleotide, DNA, RNA and protein level descriptions. |                                                                                                                                                                                                                                                                                                                                                                                                            | such as ‘variant’ ‘alteration’ and ‘change’ should be used instead of these terms. |                       |                             |                             |   |                |       |   |                       |          |   |           |         |   |                   |        |   |                       |      |
|-----------------------------------------------------------------------------------|-----------------------|------|---------------------------------------------------------------------------------------------------------------|------------------------------------------------------------------------------------------------------------------------------------------------------------------------------------------------------------------------------------------------------------------------------------------------------------------------------------------------------------------------------------------------------------|------------------------------------------------------------------------------------|-----------------------|-----------------------------|-----------------------------|---|----------------|-------|---|-----------------------|----------|---|-----------|---------|---|-------------------|--------|---|-----------------------|------|
| International Agency for Research on Cancer (IARC)                                | 2008                  | N/A  | Standardized classification system for application to sequence based results for cancer predisposition genes. | Modifier terms for ‘variant’ to describe sequence changes of varying pathogenicity:                                                                                                                                                                                                                                                                                                                        |                                                                                    |                       |                             |                             |   |                |       |   |                       |          |   |           |         |   |                   |        |   |                       |      |
|                                                                                   |                       |      |                                                                                                               | <table><tr><th>Class</th><th>Modifier</th><th>Likelihood of Pathogenicity</th></tr><tr><td>1</td><td>Not pathogenic</td><td>&lt;0.1%</td></tr><tr><td>2</td><td>Likely not pathogenic</td><td>0.1-4.9%</td></tr><tr><td>3</td><td>Uncertain</td><td>5-94.9%</td></tr><tr><td>4</td><td>Likely pathogenic</td><td>95-99%</td></tr><tr><td>5</td><td>Definitely pathogenic</td><td>&gt;99%</td></tr></table> |                                                                                    | Class                 | Modifier                    | Likelihood of Pathogenicity | 1 | Not pathogenic | <0.1% | 2 | Likely not pathogenic | 0.1-4.9% | 3 | Uncertain | 5-94.9% | 4 | Likely pathogenic | 95-99% | 5 | Definitely pathogenic | >99% |
|                                                                                   |                       |      |                                                                                                               | Class                                                                                                                                                                                                                                                                                                                                                                                                      |                                                                                    | Modifier              | Likelihood of Pathogenicity |                             |   |                |       |   |                       |          |   |           |         |   |                   |        |   |                       |      |
|                                                                                   |                       |      |                                                                                                               | 1                                                                                                                                                                                                                                                                                                                                                                                                          |                                                                                    | Not pathogenic        | <0.1%                       |                             |   |                |       |   |                       |          |   |           |         |   |                   |        |   |                       |      |
|                                                                                   |                       |      |                                                                                                               | 2                                                                                                                                                                                                                                                                                                                                                                                                          |                                                                                    | Likely not pathogenic | 0.1-4.9%                    |                             |   |                |       |   |                       |          |   |           |         |   |                   |        |   |                       |      |
|                                                                                   |                       |      |                                                                                                               | 3                                                                                                                                                                                                                                                                                                                                                                                                          |                                                                                    | Uncertain             | 5-94.9%                     |                             |   |                |       |   |                       |          |   |           |         |   |                   |        |   |                       |      |
|                                                                                   |                       |      |                                                                                                               | 4                                                                                                                                                                                                                                                                                                                                                                                                          |                                                                                    | Likely pathogenic     | 95-99%                      |                             |   |                |       |   |                       |          |   |           |         |   |                   |        |   |                       |      |
| 5                                                                                 | Definitely pathogenic | >99% |                                                                                                               |                                                                                                                                                                                                                                                                                                                                                                                                            |                                                                                    |                       |                             |                             |   |                |       |   |                       |          |   |           |         |   |                   |        |   |                       |      |
|                                                                                   |                       |      |                                                                                                               |                                                                                                                                                                                                                                                                                                                                                                                                            |                                                                                    |                       |                             |                             |   |                |       |   |                       |          |   |           |         |   |                   |        |   |                       |      |
|                                                                                   |                       |      |                                                                                                               |                                                                                                                                                                                                                                                                                                                                                                                                            |                                                                                    |                       |                             |                             |   |                |       |   |                       |          |   |           |         |   |                   |        |   |                       |      |
|                                                                                   |                       |      |                                                                                                               |                                                                                                                                                                                                                                                                                                                                                                                                            |                                                                                    |                       |                             |                             |   |                |       |   |                       |          |   |           |         |   |                   |        |   |                       |      |
|                                                                                   |                       |      |                                                                                                               |                                                                                                                                                                                                                                                                                                                                                                                                            |                                                                                    |                       |                             |                             |   |                |       |   |                       |          |   |           |         |   |                   |        |   |                       |      |
|                                                                                   |                       |      |                                                                                                               |                                                                                                                                                                                                                                                                                                                                                                                                            |                                                                                    |                       |                             |                             |   |                |       |   |                       |          |   |           |         |   |                   |        |   |                       |      |
| Evidence-Based Network for the Interpretation of Germline Mutant Alleles (ENIGMA) | 2019                  | N/A  | Review of vocabulary used for the interpretation and reporting of                                             | Developed more detailed description of the clinical implications of, and management recommendations associated with germline variants placed in each of the classification tiers                                                                                                                                                                                                                           | Highlighted inconsistencies associated with use of the term ‘mutation.’            |                       |                             |                             |   |                |       |   |                       |          |   |           |         |   |                   |        |   |                       |      |

|  |  |  |                                                   |                                        |  |
|--|--|--|---------------------------------------------------|----------------------------------------|--|
|  |  |  | germline genetic tests for cancer susceptibility. | previously described by IARC and ACMG. |  |
|--|--|--|---------------------------------------------------|----------------------------------------|--|

**Supplementary Table S2. Semi-structured interview guide**

| <b>Topic</b>                    | <b>Questions and prompts</b>                                                                                                                                                                                                                                                                                                                                                                                                                                                                                                                                                                                                                                                                            | <b>Participant group</b>            |
|---------------------------------|---------------------------------------------------------------------------------------------------------------------------------------------------------------------------------------------------------------------------------------------------------------------------------------------------------------------------------------------------------------------------------------------------------------------------------------------------------------------------------------------------------------------------------------------------------------------------------------------------------------------------------------------------------------------------------------------------------|-------------------------------------|
| Introduction                    | <p>“Sometimes telling your story may bring up a range of feelings or memories. So, just before we get started I wanted to check in to see how you are feeling. On a scale of 0-10 where 0 is “None” and 10 is “Extreme” how much DISTRESS have you experienced this past week, including today? (followed by anxiety, depression, anger and need for help) [if &gt;8, see risk management protocol at the end of the interview schedule]”</p> <p>“Do you have any questions? Please let me know if you are feeling distressed or would like to stop at any point.”</p> <p>“Just to get to know you a little, could you tell me briefly a little about your child and their experience with cancer?”</p> | parents                             |
| Demographics                    | <p>“Just to start with would you mind sharing some personal demographics with me?”</p> <ul style="list-style-type: none"> <li>- Year of birth</li> <li>- profession (we should know before interview - just to confirm)</li> <li>- number of years of practice.</li> <li>- what percent of your time is dedicated towards research?</li> <li>- How much, and what kind of formal genetics training have you had, if any? (probe: was it an elective or a compulsory part of your training?)</li> </ul>                                                                                                                                                                                                  | genetics professionals, oncologists |
| Phrasing of germline results    | “If you directly discussed germline findings with a family, do you recall how you phrased the germline results to the family?”                                                                                                                                                                                                                                                                                                                                                                                                                                                                                                                                                                          | genetics professionals, oncologists |
| Genetic terminology preferences | “We would like to know your preference on the language used to describe these types of genes to families. I am going to suggest four terms for                                                                                                                                                                                                                                                                                                                                                                                                                                                                                                                                                          | genetics Professionals, oncologists |

---

this: Faulty gene, altered gene, gene change, or genetic variant?" *[ensure you say these really slowly]*

- Of the four terms, which one do you prefer most? (why?)
- Which one do you prefer least? (why?)
- is there another word you would prefer?

---

"Sometimes changes happen in our genes which parents cause them to not work properly. This can increase a person's chance of developing cancer. We would like to know your preference on the language we use to describe these types of genes. I am going to suggest four terms for this: Faulty gene, altered gene, gene change, or genetic variant?" *[ensure you say these really slowly]*

- Of the four terms, which one do you prefer most? (why?)
  - Which one do you prefer least? (why?)
  - Is there another word you would prefer?
-
